# Crosstalk between Nitric Oxide and Retinoic Acid pathways is essential for amphioxus pharynx development

Caccavale F<sup>1</sup>, Annona G<sup>1</sup>, Subirana L<sup>2</sup>, Escriva H<sup>2</sup>, Bertrand S<sup>2</sup>, D’Aniello S<sup>1,\*</sup>

<sup>1</sup> Department of Biology and Evolution of Marine Organisms (BEOM), Stazione Zoologica Anton Dohrn Napoli, Napoli, Italy.

<sup>2</sup> Sorbonne Université, CNRS, Biologie Intégrative des Organismes Marins (BIOM), Observatoire Océanologique, Banyuls-sur-Mer, France.

\* Salvatore D’Aniello < [salvatore.daniello@szn.it](mailto:salvatore.daniello@szn.it) >

**ORCID:** 0000-0001-7294-1465

## Abstract

During animal ontogenesis, body axis patterning is finely regulated by complex interactions between several signaling pathways. Nitric Oxide (NO) and Retinoic Acid (RA) are potent morphogens that play a pivotal role in vertebrate development. Their involvement in axial patterning of head and pharynx shows conserved features in the chordate phylum. Indeed, in the cephalochordate amphioxus NO and RA are crucial for the correct development of pharyngeal structures. Here we demonstrate the functional cooperation between NO and RA occurring in amphioxus embryogenesis. During neurulation, NO modulates RA production through the transcriptional regulation of Aldh1a.2 that irreversibly converts retinaldehyde into RA. On the other hand, RA regulates the transcription of Nos genes, probably through RA Response Elements found in their regulatory regions. The reciprocal regulation of NO and RA

29 pathways results to be essential for the normal pharyngeal development in amphioxus and  
30 suggests that this regulatory crosstalk could be conserved in vertebrates.

31

## 32 **Keywords**

33 Nitric Oxide Synthase; RA pathway; Chordate; Developmental Biology; Evolution.

34

35

## 36 **Introduction**

37 The ontogenesis of the vertebrate head is a complex developmental process in which both  
38 neural crest and non-neural crest cells participate. The craniofacial development and the  
39 correct antero-posterior patterning of head structures are driven by complex interactions  
40 between several signaling pathways and epigenetic mechanisms (Haworth et al., 2007; Jacox  
41 et al., 2014; Kong et al., 2014; Francis-West and Crespo-Enriquez, 2016). In this context Nitric  
42 Oxide (NO) is a potent morphogen playing crucial roles in head structures development. Loss-  
43 of-function of neuronal Nitric Oxide Synthase (*Nos1*) in *Xenopus* and zebrafish induces the  
44 arrest of mouth opening, smaller eye and strong aberrations in cartilage and bone structures  
45 formation (Jacox et al., 2014). Moreover, the inhibition of NO production is responsible for  
46 severe defects in pharyngeal arches patterning, consistent with alterations in the Hox code  
47 (Kong et al., 2014).

48 The development and the antero-posterior and dorso-ventral patterning of the head and  
49 pharynx show conserved features within the chordate phylum. In amphioxus, which belongs to  
50 the cephalochordate subphylum, pharynx is characterized by a marked left-right asymmetry  
51 which is controlled by the Nodal signaling pathway, namely by the Cerberus-Nodal-Lefty-Pitx

52 cascade (Bertrand et al., 2015; Soukup et al., 2015; Li et al., 2017). The antero-posterior  
53 patterning and development of amphioxus pharyngeal slits are driven by a conserved set of  
54 transcription factor genes, among which *Hox1*, *Pax2/5/8*, *Pitx*, *Tbx1/10*, and *Engrailed*  
55 (Schubert et al., 2005; Bertrand et al., 2015; Wang et al., 2019) similarly to the development of  
56 pharyngeal arches in vertebrates.

57 NO is enzymatically produced in amphioxus by three distinct NO synthase genes: *NosA*, *NosB*  
58 and *NosC*, derived from cephalochordate-specific gene duplications and showing a  
59 complementary expression pattern during development (Annona et al., 2017). During  
60 amphioxus embryonic development, as a consequence of pharmacological inhibition of  
61 endogenous NO production, the opening of the mouth is prevented as well as the correct  
62 development of other important pharyngeal structures, such as the endostyle and the club-  
63 shaped gland (Annona et al., 2017). Moreover, the larvae show a posteriorized phenotype,  
64 resembling the well described phenotype induced by RA administration during amphioxus  
65 embryogenesis (Escriva et al., 2002; Schubert et al., 2005; Koop et al., 2014). These  
66 experimental evidences prompted us to investigate the hypothesis of a possible evolutionarily  
67 conserved role of NO and RA in chordate pharynx development using the cephalochordate  
68 *Branchiostoma lanceolatum* as a model system. In order to highlight the molecular  
69 mechanisms driving developmental changes in the amphioxus embryo, we took advantage of  
70 the transcriptomic differences induced by pharmacological treatments reducing endogenous  
71 NO production, which alter the pharyngeal area development (Annona et al., 2017). Our  
72 approach allowed us to demonstrate that such morphogenetic alterations are linked to a  
73 dramatic imbalance affecting the reciprocal regulation of NO and RA pathways.

74

75

## 76 **Results**

### 77 **NO controls pharyngeal development during early neurulation in amphioxus**

78 Previous studies have highlighted the involvement of NO in the specification of amphioxus  
79 pharyngeal structures (Annona et al., 2017). To better characterize the key role of NO during  
80 embryonic development, we decided to narrow down the time window of treatment by defining  
81 the exact timing during which NO is functional. Therefore, we performed short-term *in vivo*  
82 treatments with the NOS activity inhibitor 1-[2-(trifluoromethyl)phenyl]-1H-imidazole (TRIM)  
83 during *B. lanceolatum* development using different drug exposure times between early neurula  
84 stage (N2 stage) and pre-mouth larva stage (transition stage T2) (Figure 1A). The resulting  
85 phenotype was then observed at the open-mouth larva stage (larva-L0 stage). The observed  
86 morphological alterations included: *i.* a reduced antero-posterior length of the pharynx, *ii.* a  
87 complete or partial absence of mouth opening on the left side of the pharynx (Figure 1B, section  
88 c and c'), *iii.* an incomplete formation of the club-shaped gland and of the endostyle (Figure 1B,  
89 section d, e and d', e'), and *iv.* a smaller first gill slit (Figure 1B, section f and f').

90 The inhibition of NO production during the time window 24-30 hours post fertilization (hpf, at  
91 18°C) was the shortest treatment inducing a strong effect by producing 100% of abnormal  
92 larval while delayed treatments starting at 30 or 36 hpf, for 6, 12 or 24 hours, resulted in  
93 approximately 70% of affected larvae. Conversely, when TRIM treatment was performed later,  
94 between 42 and 48 hpf, the larvae were not affected (Figure 1A). These results suggest,  
95 therefore, that pharyngeal development is, at least in part, under the control of NO during  
96 neurulation and that the critical time of its action is restricted approximately to six hours. Based  
97 on these experimental evidences, we performed a differential transcriptomic analysis  
98 comparing TRIM-treated embryos (continuous treatment from 24 to 30 hpf) with wild-type

99 embryos in order to define the genes acting downstream of NO signaling during pharyngeal  
100 development in amphioxus (Figure. 1C - figure supplement 1).

101

102 **Inhibition of NO synthesis *in vivo* induces up-regulation and ectopic expression of RA**  
103 **pathway genes**

104 The differential RNA-Seq analysis of TRIM-treated embryos (30 hpf) revealed the up-regulation  
105 of 392 and the down-regulation of 50 genes (Figure 1 C - figure supplement 1 panels A-B-C).

106 Interestingly, several differentially up-regulated genes are implicated in RA metabolism and  
107 signaling pathway (synthesis and storage, catabolism, and known direct RA target genes):

108 *Adh3, Rdh11/12.18, Aldh1a.2, Crabp, Cyp26.1, Cyp26.2, Cyp26.3, RAR, Hox1, Hox3, Meis*

109 (Figure 1C – figure supplement 2). In order to confirm this finding, the expression levels of

110 several of these genes were additionally analyzed by quantitative RT-PCR (qRT-PCR). The

111 results showed a consistent expression change trend with the RNA-seq data (Figure 1C - figure

112 supplement 1 panel D). Moreover, the expression pattern of RA target genes *Hox1, Hox3, Meis*

113 and *Cyp26* genes was further investigated by whole-mount *in situ* hybridization in both control

114 and TRIM-treated embryos at the neurula N4 and pre-mouth T2 developmental stages. Such

115 analyses showed that endogenous NO reduction produced an effect not only on the expression

116 level of RA metabolism and signaling pathway genes, but also on the expression territories of

117 most of them. *Hox1, Hox3* and *Meis* anterior limit of expression was pushed anteriorly in TRIM-

118 treated embryos in comparison to controls, indicative of the embryo posteriorization (Figure

119 2A). The RA catabolism genes that are duplicated in amphioxus, *Cyp26.1, Cyp26.2, Cyp26.3,*

120 denoted an heterogeneous behavior: *Cyp26.2* was slightly up-regulated and its expression

121 pattern did not change after TRIM treatment, whereas *Cyp26.1* and *Cyp26.3* were strongly up-

122 regulated and showed an ectopic expression (Figure 2A). In particular, after inhibition of NO

123 production, *Cyp26.1* expression was anteriorized, while *Cyp26.3* expression was posteriorized.  
124 Moreover, *Cyp26.3* showed an additional domain of expression in the tailbud, mainly in the  
125 pre-mouth larvae (Figure 2A).

126

### 127 ***Aldh1a.2* is specifically regulated by NO**

128 The above-mentioned gene expression results suggested that the abnormal pharyngeal  
129 development of TRIM-treated embryos could be the result of an up-regulation of the RA  
130 signaling pathway. In order to test this hypothesis, we performed two *in vivo* experiments in  
131 parallel in which early neurula embryos were incubated for 6 hours, from 24 to 30 hpf, in the  
132 presence of either TRIM or RA. Then, we analyzed the relative expression of three groups of  
133 genes, that previously we found to be up-regulated in our RNA-seq analysis, by qRT-PCR: *i.*  
134 genes involved in the synthesis and in storage of RA, as *Adh3*, *Rdh11/12*, *Aldh1a.2*, *Crabp*; *ii.*  
135 genes that mediate RA effects, as *RAR*, *Hox1*, *Hox3*, *Meis*; and *iii*) genes involved in RA  
136 degradation, as *Cyp26.1*, *Cyp26.2*, *Cyp26.3*. All analyzed genes were up-regulated after both  
137 TRIM and RA treatment, with the exception of *Aldh1a.2* which was exclusively up-regulated  
138 after TRIM treatment (Figure 2 B-C-D).

139

### 140 ***NosA* and *NosB* respond to exogenous RA during development**

141 The expression analysis of the three amphioxus *Nos* genes after TRIM treatment revealed the  
142 transcriptional up-regulation for two of them, *NosA* and *NosB*, while *NosC*, the only one  
143 constitutively expressed during development (Annona et al., 2017) remained insensitive to the  
144 pharmacological treatment (Figure 2E).

145 In order to check if *NosA* and *NosB* up-regulation could be due to an indirect effect of the  
146 intracellular increase of RA caused by the TRIM treatment, we tested their expression levels

147 after the addition of exogenous RA (Figure 2E). Similarly, to the TRIM treatment, we observed  
148 that *NosA* and *NosB* expression were significantly up-regulated also as a consequence of RA  
149 administration. Moreover, exogenous RA induces up-regulation of *NosA* expression up to 36  
150 hpf and *NosB* expression up to 48 hpf (Figure 2E - figure supplement 3 panel A).  
151 These experimental evidences suggest a possible transcriptional effect of RA on *Nos* genes  
152 during embryogenesis in amphioxus. To further support this assumption, we searched for the  
153 presence of Retinoic Acid Response Elements (RARE) in the putative regulatory genomic  
154 regions of *NosA* and *NosB*, using a computational prediction tool. We looked for RAREs in  
155 selected open chromatin regions identified by the overlapping peaks obtained from ATAC-seq  
156 and Chip-seq data (Marlétaz et al., 2018). Six putative Direct Repeat (DR)-type binding sites  
157 were detected in the *NosA* locus (two DR1, three DR3 and one DR5), and only one DR5 in the  
158 5' region of *NosB* (Figure supplement 3 panel B), suggesting a possible direct RA regulation of  
159 *Nos* genes in amphioxus.

160

161 **A RALDH inhibitor and a RAR antagonist are able to rescue the normal phenotype after**  
162 **inhibition of NO synthesis**

163 To confirm that the up-regulation of *Aldh1a.2*, which could result in an endogenous RA  
164 increase, is the key event underlying pharyngeal alterations in TRIM-treated larvae, we  
165 performed two independent phenotypic rescue experiments using the RALDH inhibitor DEAB  
166 (N,N-diethylaminobenzaldehyde) and the RA antagonist BMS009. Both DEAB and BMS009  
167 were applied in combination with TRIM to embryos at 24 hpf and removed at 30 hpf. As a  
168 control, the TRIM treatment was performed in parallel on another batch of embryos. The  
169 combined treatment with TRIM and DEAB resulted in the recovery of the wild type phenotype  
170 in 76% of the total observed larvae, while 14% of them showed a partially recovered phenotype

171 with a smaller mouth compared to controls (Figure 3A, B). The rescue experiments performed  
172 using the combination of TRIM and BMS009 led to 54% of complete and 21% of partial  
173 recovery of the wild type larval morphology (Figure 3A). Moreover, these morphological rescue  
174 experiments were associated with the recovery at N4 neurula stage of the normal expression  
175 pattern of RA catabolism (*Cyp26.1* and *Cyp26.3*) and RA target (*Hox1*, *Hox3* and *Meis*) genes  
176 (Figure 3C).

177 Therefore, by using two independent experiments, we demonstrate that the reduction of RA  
178 levels, or of its regulatory action, in TRIM-treated embryos, rescues the wild type phenotype,  
179 suggesting that the observed phenotype in TRIM-treated embryos is produced by an increase  
180 in RA signaling.

181

## 182 **Discussion**

### 183 **NO controls RA synthesis by the transcriptional regulation of *Aldh1a.2***

184 The inhibition of NO production during amphioxus neurulation affects the normal formation and  
185 localization of pharyngeal structures at the larva stage, including the length of the pharynx  
186 itself. From a molecular point of view, the differential RNA-seq approach revealed a clear up-  
187 regulation of different RA pathway players after Nos activity inhibition, suggesting that such de-  
188 regulation is responsible for the observed phenotype. The role of RA in pharyngeal  
189 morphogenesis has been extensively described in the literature; RA acts through *Hox1* in  
190 establishing the posterior limit of amphioxus pharynx. *Hox1* is co-expressed with the RA  
191 receptor (RAR) in the midgut endoderm and, in turn, represses the expression of pharyngeal  
192 endoderm markers, such as *Pax1/9* and *Otx* (Schubert et al., 2005). Nevertheless, the  
193 formation of pharyngeal slits requires low levels of RA. This condition is guaranteed *i.* by the  
194 activity of RA degradation enzymes (*Cyp26*), *ii.* by the expression of TR2/4, a transcriptional



195 repressor which binds on RAREs and decreases RA signaling in the anterior part of the animal,  
196 and *iii.* by the fact that the embryonic region producing RA (the central region of the embryo)  
197 moves posteriorly as the embryo elongates (Escriva et al., 2002; Koop et al., 2014). In our  
198 studies, as a result of Nos activity inhibition, the RA target genes, *Hox1*, *Hox3* and *Meis*,  
199 showed an increased expression level and an anterior limit of expression which is moved  
200 anteriorly, consistent with the posteriorization of the larva body plan. Furthermore, the RA  
201 degrading enzyme genes, *Cyp26.1* and *Cyp26.3*, were also sensible to the inhibition of  
202 endogenous NO production showing an increased and ectopic expression. *Cyp26* genes are  
203 required for RA degradation in endoderm and ectoderm and have a key role in the  
204 establishment and maintenance of the antero-posterior RA concentration gradient in  
205 amphioxus (Carvalho et al., 2017a). The up-regulation of *Cyp26* genes is a known  
206 consequence of RA excess, which is responsible of the posteriorization of larval body  
207 structures and of the pharynx loss (Escriva et al., 2002; Schubert et al., 2005; Schubert et al.,  
208 2006; Minoux and Rijli, 2010 ; Koop et al., 2010, 2014; Bertrand et al., 2015; Carvalho et al.,  
209 2017b). Altogether, these results suggested that the observed phenotype in the TRIM-treated  
210 amphioxus embryos could be due to an increase in RA production. Intracellular RA is  
211 synthesized by the reversible oxidation of retinol in retinaldehyde by either alcohol  
212 dehydrogenases (ADH) or retinol dehydrogenases (RDH). Subsequently, retinaldehyde is  
213 irreversibly oxidized to RA by retinaldehyde dehydrogenases (RALDH), mainly by ALDH1A  
214 (Gallego et al., 2006; Duester, 2008). In particular, in our experiments we observed  
215 transcriptional up-regulation of *Adh3*, *Rdh11/12.18* and *Aldh1a.2* after TRIM treatments. The  
216 unique orthologue of vertebrate *Adh* genes, *Adh3*, was identified in amphioxus (Cañestro et  
217 al., 2002). Instead, 22 *Rdh11/12* genes in amphioxus, derived from a lineage-specific  
218 expansion, were identified as related to human *Rdh11*, *Rdh12*, *Rdh13* and *Rdh14*,

219 corresponding to retinaldehyde reductases predominantly involved in retinoid metabolism and  
220 homeostasis (Albalat et al., 2011) (Figure supplement 2). For *Aldh1*, a total of six genes were  
221 identified in amphioxus, orthologs of human *Aldh1A1-3*, which are major players in the  
222 oxidation of RA (Cañestro et al., 2006) (Figure supplement 2). In our study, *Adh3* and  
223 *Rdh11/12.18* genes also resulted up-regulated after administration of exogenous RA,  
224 suggesting a feedback regulation of RA synthesis by itself, at least on reversible enzymatic  
225 steps. On the other hand, *Aldh1a.2* was insensible to exogenous RA excess. Based on these  
226 results we hypothesized that, under physiological conditions, NO transcriptionally regulates  
227 *Aldh1a.2* and, as a consequence, controls the production of endogenous RA. Further evidence  
228 to support our hypothesis is provided by two independent rescue experiments. Technically, in  
229 association with TRIM, we used two drugs that specifically act on most crucial steps of RA  
230 signaling pathway: an inhibitor of the RALDH enzymes activity that would compensate the  
231 excess of *Aldh1a.2*, and a RA antagonist able to compensate the RA over-production through  
232 its binding to RAR. In both rescue experiments we observed not only the recovery of the wild  
233 type phenotype but also the restoration of the expression pattern of both RA-target and RA-  
234 degrading genes.

235 Therefore, based on our results, we propose NO as a key player in the fine regulation of RA  
236 synthesis during neurulation in amphioxus. Thus, NO fine-tune the expression of *Aldh1a.2*,  
237 keeping RA concentration within the optimal range. This precise balance between intracellular  
238 concentrations of NO and RA guarantees the correct expression levels and territory localization  
239 of all RA downstream target genes. When NO is removed from the system the RA metabolism  
240 machinery malfunctions, giving rise to a consequent cascade of events that lead to the up-  
241 regulation of the entire RA signaling pathway.

242 The missing piece of the puzzle, therefore, seems to be an unknown protein able to mediate  
243 the control of *Aldh1a.2* transcription by NO. The activity of such protein could depend on its  
244 phosphorylation and S-nitrosylation state that would be modulated by NO. Indeed, in other  
245 chordates, it has been demonstrated that the mechanisms by which NO regulates transcription  
246 of target genes are: *i.* the control of the extracellular-regulated kinase (ERK) and the MAP  
247 kinase phosphatases (MAPK) activity and, as a result, the modulation of phosphorylation or  
248 dephosphorylation of target transcription factors (Castellano et al., 2014), and *ii.* the direct  
249 modulation of target proteins, as transcription factors, histone acetyltransferases and  
250 deacetylases or DNA methyltransferases, through S-nitrosylation of specific cysteine residues  
251 (Bogdan, 2001; Nott et al., 2008; Sha and Marshall, 2012).

252 Hence, further research is necessary to find out which is the NO-target protein that mediates  
253 *Aldh1a.2* expression regulation and how NO specifically controls its activity. It could be  
254 important improve this knowledge since very little information, and only restricted to  
255 vertebrates, is reported on the control of RA metabolism by NO. Some cytochrome P450  
256 enzymes, involved in RA–metabolism, were identified as putative NO–regulated proteins but  
257 no evidences about such a possible transcriptional regulation have been reported (Lee et al.,  
258 2014, 2017).

259

## 260 **RA controls NO synthesis**

261 The exogenous administration of RA induces the expression of two amphioxus *Nos* genes that  
262 are normally not expressed during development, *NosA* and *NosB* (Annona et al., 2017).  
263 Moreover, this activation is maintained throughout the whole critical time period during which  
264 NO is necessary for pharyngeal development (Figure supplement 3 panel A). Conversely,

265 *NosC*, the only *Nos* gene expressed during embryogenesis in normal conditions, seems not to  
266 be affected by the increase of RA level.

267 The *in silico* analysis of the chromosomal loci of both *B. lanceolatum* *NosA* and *NosB* revealed  
268 the presence of seven DR-type RAREs (Figure supplement 3 panel B), localized in open  
269 chromatin regions detected by ATAC-seq and Chip-seq approaches. This suggests a possible  
270 regulation of *Nos* genes by RA through the binding of RAR/RXR nuclear receptors to these  
271 putative RAREs. The transcriptional activation of *NosA* and *NosB* by RA during development  
272 could be part of a mechanism to rebalance the correct NO/RA ratio. However, this hypothesis  
273 should be further confirmed by experimental validation.

274 In vertebrates, the role of NO and RA in the correct development of the pharynx and craniofacial  
275 structures has already been described. For example, NO is described to be necessary for face  
276 formation as part of the Kinin-Kallikrein pathway (Jacox et al., 2014) and, on the other hand,  
277 the correct RA gradient, generated by local degradation, leads to appropriate specification of  
278 craniofacial structures (Abe et al., 2008; Liu et al., 2013; Chawla et al., 2018).

279 However, a possible crosstalk between NO and RA pathways has not yet been revealed. As  
280 mentioned above, there are few published data on the regulatory effect of NO on RA pathway,  
281 while the control of RA on NO production in vertebrates is more documented. For instance, in  
282 human cells, it has been demonstrated the inhibitory or activation effect of RA on NO production  
283 through activation of inducible or endothelial NOS at both protein and transcript levels (Sirsjö  
284 et al., 2000; Achan et al., 2002; Hattori et al., 2002; Behairi et al., 2015; Moon, 2019).

285

## 286 **Conclusions**

287 Our results show the presence of a functional crosstalk between RA and NO signals in the  
288 cephalochordate amphioxus during neurulation. This opens new questions about the

289 evolutionary conservation of this regulatory loop in the development of the pharynx and the  
290 head of vertebrates.

291 The role of RA as well as that of NO in amphioxus development and antero-posterior patterning  
292 of the pharynx has been described in several studies. Our results suggest the occurrence of a  
293 regulatory crosstalk between these two ancient and essential signaling pathways that has been  
294 previously neglected. Based on our data we propose that, during amphioxus development, a  
295 precise NO/RA balance is necessary for the correct antero-posterior patterning of the pharynx.  
296 This endogenous intracellular balance is preserved by the reciprocal regulation of NO and RA  
297 pathways. Given such evidences and knowledge from vertebrate literature, we hypothesize  
298 that the functional and regulatory crosstalk between NO and RA pathways could be a  
299 conserved feature in vertebrates.

300

## 301 **Materials & Methods**

### 302 **Amphioxus embryos collection**

303 Ripe adult European amphioxus (*Branchiostoma lanceolatum*) were collected in Argelès-sur-  
304 mer (France) with a specific permission delivered by the Prefect of Region Provence Alpes  
305 Côte d'Azur. *B. lanceolatum* is not a protected species. Spawning was induced during late  
306 spring and beginning of summer by employing a thermal shock as described by Fuentes *et*  
307 *al.*(Fuentes *et al.*, 2007) After *in vitro* fertilization, embryos were cultured in 0,22 µm filtered  
308 seawater at 18°C in plastic Petri dishes. Following the staging at 18°C, 24 hpf corresponds to  
309 neurula 2 stage (N2), 30 hpf to neurula 4 stage (N4), 36 hpf to transition 1 stage (T1), 42 hpf  
310 to transition 2 stage (T2), 48 hpf to transition 3 stage (T3), and 72 hpf to larva 0 (L0). At desired  
311 developmental stages embryos were used for specific drug treatments, and then they were  
312 frozen in liquid nitrogen and kept at -80°C for subsequent RNA extraction, or fixed with 4%

313 paraformaldehyde (PFA) in MOPS buffer overnight at 4°C and then stored in 70% ethanol at -  
314 20°C.

315

### 316 **Pharmacological treatments**

317 Amphioxus embryos at different developmental stages were treated with the NOS inhibitor 1-  
318 [2-(trifluoromethyl)phenyl]-1H-imidazole (TRIM), with the RALDH inhibitor N,N-  
319 diethylaminobenzaldehyde (DEAB), with the RA antagonist BMS009 and with Retinoic Acid  
320 (RA). All the drugs were dissolved in dimethyl sulfoxide (DMSO), and control embryo groups  
321 for each treatment were prepared adding an equal amount of DMSO. For TRIM treatments, a  
322 final concentration of 100 µM was used starting at 24 hpf. Embryos at 30, 36, 42 and 48 hpf  
323 were collected or were rinsed in filtered seawater and allowed to develop until 72 hpf to observe  
324 phenotype. For RA treatments, a final concentration of 10<sup>-6</sup> M was used. Embryos were  
325 collected at the developmental stages of 30, 36, 42 and 48 hpf. All the treatments were  
326 performed in biological triplicates.

327 For rescue experiments, embryos at 24 hpf were treated simultaneously with a combination of  
328 100 µM TRIM and 25 µM DEAB, or 100 µM TRIM and 10<sup>-6</sup> M BMS009. At 30 hpf they were  
329 rinsed in filtered seawater and allowed to develop until 72 hpf stage when the phenotype was  
330 observed. The experiment was performed in biological duplicates.

331 Control and TRIM-treated larvae at 72 hpf were stained with DAPI. A high-resolution Z-stack  
332 was acquired using a Zeiss confocal microscopy LSM 800, and a medium speed fast interactive  
333 deconvolution was applied. For the digital sections, Imaris 9.3.1 software was used.

334

### 335 **RNA-seq analysis**

336 Total RNA was extracted from embryos using the RNeasy Plus Mini Kit (QIAGEN) after sample  
337 homogenization using the TissueLyser (QIAGEN). The RNA integrity number (RIN) was  
338 assessed by using TapeStation 4200 while RNA concentration and purity were estimated using  
339 a Nanodrop spectrophotometer. Indexed libraries were prepared from 1 µg/ea purified RNA  
340 with TruSeq Stranded Total RNA Library Prep Kit. Libraries were quantified using the Agilent  
341 2100 Bioanalyzer (Agilent Technologies) and pooled so that each index-tagged sample was  
342 present in equimolar amounts, with a final concentration of 2 nM. The pooled samples at a final  
343 concentration of 10 pM were subjected to cluster generation and sequencing using an Illumina  
344 NextSeq500 System in a 1x75 single read format (30 millions of reads). The raw sequence  
345 files generated (fastq files) underwent quality control analysis using FastQC. Transcriptome  
346 sequences were deposited in the NCBI Sequence Read Archive (SRA) database with the  
347 accession number: PRJNA630453.

348 Reads were mapped on the *B. lanceolatum* transcriptome (Oulion et al., 2012) using the aligner  
349 Bowtie2 with default parameters (Langmead and Salzberg, 2012). The read counts were  
350 obtained using IdxStats (Li et al., 2009; Cock et al., 2013) and the differential expression  
351 analysis between treated and wild-type embryos was performed using the R package DESeq2  
352 (Love et al., 2014). Mapping and read counting were performed on the Roscoff ABiMS galaxy  
353 platform.

354

### 355 **Phylogenetic analysis**

356 Phylogenetic analysis was necessary to establish the orthology relationships of the RA  
357 synthesis genes differentially expressed in our experiments. Protein alignments were  
358 generated with ClustalX program using the sequence database reported in Handberg-  
359 Thorsager *et al.* (Handberg-Thorsager et al., 2018) . Phylogenetic trees were based on

360 maximum-likelihood inferences calculated with PhyML v3.0 (Guindon et al., 2010) (Figure  
361 supplement 2).

362

### 363 **Computational prediction of DR-type RAREs in *NosA* and *NosB* genomic loci**

364 We selected open chromatin genomic regions in the vicinity of *Nos* genes by choosing regions  
365 corresponding to ATAC-seq peaks (8, 15, 36, 60 hpf) overlapping with ChIP-seq signals for the  
366 H3K4me3 mark at the same developmental times. The prediction of putative Direct Repeats  
367 (DR) binding sites in the genomic loci of *NosA* and *NosB* was assessed by NHR-SCAN tool  
368 (Sandelin and Wasserman, 2005), using the following parameter: 0,01 combined probability of  
369 entering match states.

370

### 371 **Gene expression analysis by whole-mount *in situ* hybridization**

372 *Hox1, Hox3, Meis, Cyp26.1, Cyp26.2, Cyp26.3* were cloned in pGEM-T vector (Promega) using  
373 primers listed in Supplementary table 1. Antisense riboprobes were synthesized and *in situ*  
374 hybridizations were performed as previously described (Annona et al., 2017). Embryos were  
375 mounted in 80% glycerol in PBS, and photographed using an Axio Imager.Z2.

376

### 377 **Gene expression analysis by qRT-PCR**

378 Total RNA was extracted from embryos at different developmental stages: 30, 36, 42 and 48  
379 hpf (Figure 1A), using the RNeasy Plus Mini Kit (QIAGEN). 350-1000 ng of total RNA were  
380 retrotranscribed in cDNA which was used undiluted (only for *Nos* genes) or diluted 1:10 for the  
381 quantitative PCR. Each qPCR reaction contained a final concentration of 0.7  $\mu$ M of each primer  
382 and Fast SYBR Green Master mix with ROX (Applied Biosystems) in 10  $\mu$ l total volume. PCR  
383 reactions were run in a ViiA™ 7 Real-Time PCR System (Applied Biosystems). The cycling



384 conditions were: 95°C for 20 s, 40 cycles with 95°C for 1 s, 60°C for 20 s, 95°C for 15 s, 60°C  
385 1 min, followed by a dissociation curve analysis using a gradient from 60°C to 95°C with a  
386 continuous detection at 0.015°C/sec increment for 15 min. The results were analyzed using  
387 the ViiA™-7 Software and exported into Microsoft Excel for further analysis. Each sample was  
388 processed in biological triplicates. Ribosomal protein L32 (*Rpl32*), expressed at a constant  
389 level during development, was used as a reference gene for the normalization of each gene  
390 expression level (Annona et al., 2017). Primers used are listed in Supplementary table 1. For  
391 the statistical analysis, we used the GraphPad Prism software employing the T-test. Statistical  
392 significance cut off criteria was set at  $p < 0.05$ .

393

## 394 **Acknowledgments**

395 The authors thank Rebecca Adikes and Hannah Rosenblatt, course assistants at the MBL  
396 Embryology Course 2019 in Woods Hole (USA), for their help with imaging. We are also  
397 grateful to Enrico D’Aniello and Ricard Albalat for their critical reading of the manuscript. We  
398 are grateful to the Institut Français de Bioinformatique and the Roscoff Bioinformatics platform  
399 ABiMS for providing computing and storage resources for the RNA-seq analysis. We thank the  
400 BIO2MAR platform for giving us access to analytical material.

401 SD and FC acknowledge the Assemble Plus Project (contract numbers BA010618 and  
402 360BA0619) and The Company of Biologists (grant number: DEVTF-170211; Sponsoring  
403 Journal: Development) for supporting research visits to the Observatoire Océanologique of  
404 Banyuls-sur-Mer (France). FC was supported by an OU-SZN PhD fellowship. SB is supported  
405 by the Institut Universitaire de France (IUF). HE is supported by the Centre national de la  
406 recherche scientifique and Agence Nationale de la Recherche (ANR) grants no. ANR-16-  
407 CE12-0008-01 and ANR-19-CE13-0011.

## 408 **References**

- 409
- 410 Abe M, Maeda T, Wakisaka S. 2008. Retinoic acid affects craniofacial patterning by changing  
411 Fgf8 expression in the pharyngeal ectoderm. *Dev Growth Differ* **50**:717–729.  
412 doi:10.1111/j.1440-169X.2008.01069.x
- 413 Achan V, Tran CTL, Arrigoni F, Whitley GSJ, Leiper JM, Vallance P. 2002. all- trans -Retinoic  
414 Acid Increases Nitric Oxide Synthesis by Endothelial Cells. *Circ Res* **90**:764–769.  
415 doi:10.1161/01.RES.0000014450.40853.2B
- 416 Albalat R, Brunet F, Laudet V, Schubert M. 2011. Evolution of Retinoid and Steroid Signaling:  
417 Vertebrate Diversification from an Amphioxus Perspective. *Genome Biol Evol* **3**:985–  
418 1005. doi:10.1093/gbe/evr084
- 419 Annona G, Caccavale F, Pascual-Anaya J, Kuratani S, De Luca P, Palumbo A, D’Aniello S.  
420 2017. Nitric Oxide regulates mouth development in amphioxus. *Sci Rep* **7**:8432.  
421 doi:10.1038/s41598-017-08157-w
- 422 Behairi N, Belkhef M, Mesbah-Amroun H, Rafa H, Belarbi S, Tazir M, Touil-Boukoffa C.  
423 2015. All-*trans*-Retinoic Acid Modulates Nitric Oxide and Interleukin-17A Production by  
424 Peripheral Blood Mononuclear Cells from Patients with Alzheimer’s Disease.  
425 *Neuroimmunomodulation* **22**:385–393. doi:10.1159/000435885
- 426 Bertrand S, Aldea D, Oulion S, Subirana L, de Lera AR, Somorjai I, Escriva H. 2015. Evolution  
427 of the Role of RA and FGF Signals in the Control of Somitogenesis in Chordates. *PLoS*  
428 *One* **10**. doi:10.1371/journal.pone.0136587
- 429 Bogdan C. 2001. Nitric oxide and the regulation of gene expression. *Trends Cell Biol* **11**:66–  
430 75. doi:10.1016/S0962-8924(00)01900-0
- 431 Cañestro C, Albalat R, Hjelmqvist L, Godoy L, Jörnvall H, González-Duarte R. 2002. Ascidian  
432 and Amphioxus Adh Genes Correlate Functional and Molecular Features of the ADH  
433 Family Expansion During Vertebrate Evolution. *J Mol Evol* **54**:81–89. doi:10.1007/s00239-  
434 001-0020-2
- 435 Cañestro C, Postlethwait JH, Gonzalez-Duarte R, Albalat R. 2006. Is retinoic acid genetic  
436 machinery a chordate innovation? *Evol Dev* **8**:394–406. doi:10.1111/j.1525-  
437 142X.2006.00113.x
- 438 Carvalho JE, Lahaye F, Croce JC, Schubert M. 2017a. CYP26 function is required for the  
439 tissue-specific modulation of retinoic acid signaling during amphioxus development. *Int J*

- 440 *Dev Biol* **61**:733–747. doi:10.1387/ijdb.170227ms
- 441 Carvalho JE, Theodosiou M, Chen J, Chevret P, Alvarez S, De Lera AR, Laudet V, Croce JC,  
442 Schubert M. 2017b. Lineage-specific duplication of amphioxus retinoic acid degrading  
443 enzymes (CYP26) resulted in sub-functionalization of patterning and homeostatic roles.  
444 *BMC Evol Biol* **17**:24. doi:10.1186/s12862-016-0863-1
- 445 Castellano I, Ercolesi E, Palumbo A. 2014. Nitric Oxide Affects ERK Signaling through Down-  
446 Regulation of MAP Kinase Phosphatase Levels during Larval Development of the  
447 Ascidian *Ciona intestinalis*. *PLoS One* **9**. doi:10.1371/journal.pone.0102907
- 448 Chawla B, Swain W, Williams AL, Bohnsack BL. 2018. Retinoic Acid Maintains Function of  
449 Neural Crest–Derived Ocular and Craniofacial Structures in Adult Zebrafish. *Investig*  
450 *Ophthalmology Vis Sci* **59**:1924–1935. doi:10.1167/iovs.17-22845
- 451 Cock PJA, Grüning BA, Paszkiewicz K, Pritchard L. 2013. Galaxy tools and workflows for  
452 sequence analysis with applications in molecular plant pathology. *PeerJ* **1**:e167.  
453 doi:10.7717/peerj.167
- 454 Duester G. 2008. Retinoic Acid Synthesis and Signaling during Early Organogenesis. *Cell*  
455 **134**:921–931. doi:10.1016/j.cell.2008.09.002
- 456 Escriva H, Holland ND, Gronemeyer H, Laudet V, Holland LZ. 2002. The retinoic acid signaling  
457 pathway regulates anterior/posterior patterning in the nerve cord and pharynx of  
458 amphioxus, a chordate lacking neural crest. *Development* **129**:2905–16.
- 459 Francis-West P, Crespo-Enriquez I. 2016. Vertebrate Embryo: Craniofacial Development ELS.  
460 Chichester, UK: John Wiley & Sons, Ltd. pp. 1–15.  
461 doi:10.1002/9780470015902.a0026602
- 462 Fuentes M, Benito E, Bertrand S, Paris M, Mignardot A, Godoy L, Jimenez-Delgado S, Oliveri  
463 D, Candiani S, Hirsinger E, D’Aniello S, Pascual-Anaya J, Maeso I, Pestarino M, Vernier  
464 P, Nicolas JF, Schubert M, Laudet V, Genevriere AM, Albalat R, Garcia Fernandez J,  
465 Holland ND, Escriva H. 2007. Insights into spawning behavior and development of the  
466 European amphioxus (*Branchiostoma lanceolatum*). *J Exp Zool B Mol Dev Evol* **308**:484–  
467 493.
- 468 Gallego O, Belyaeva O V., Porté S, Ruiz FX, Stetsenko A V., Shabrova E V., Kostereva N V.,  
469 Farrés J, Parés X, Kedishvili NY. 2006. Comparative functional analysis of human  
470 medium-chain dehydrogenases, short-chain dehydrogenases/reductases and aldo-keto

- 471 reductases with retinoids. *Biochem J* **399**:101–109. doi:10.1042/BJ20051988
- 472 Guindon S, Dufayard J-F, Lefort V, Anisimova M, Hordijk W, Gascuel O. 2010. New Algorithms  
473 and Methods to Estimate Maximum-Likelihood Phylogenies: Assessing the Performance  
474 of PhyML 3.0. *Syst Biol* **59**:307–321. doi:10.1093/sysbio/syq010
- 475 Handberg-Thorsager M, Gutierrez-Mazariegos J, Arold ST, Kumar Nadendla E, Bertucci PY,  
476 Germain P, Tomançak P, Pierzchalski K, Jones JW, Albalat R, Kane MA, Bourguet W,  
477 Laudet V, Arendt D, Schubert M. 2018. The ancestral retinoic acid receptor was a low-  
478 affinity sensor triggering neuronal differentiation. *Sci Adv* **4**:1–16.  
479 doi:10.1126/sciadv.aao1261
- 480 Hattori M, Kato Y, Fujihara N. 2002. Retinoic acid suppression of endothelial nitric oxide  
481 synthase in porcine oocyte. *Can J Physiol Pharmacol* **80**:777–782. doi:10.1139/y02-099
- 482 Haworth KE, Wilson JM, Grevellec A, Cobourne MT, Healy C, Helms JA, Sharpe PT, Tucker  
483 AS. 2007. Sonic hedgehog in the pharyngeal endoderm controls arch pattern via  
484 regulation of Fgf8 in head ectoderm. *Dev Biol* **303**:244–258.  
485 doi:10.1016/j.ydbio.2006.11.009
- 486 Jacox L, Sindelka R, Chen J, Rothman A, Dickinson A, Sive H. 2014. The Extreme Anterior  
487 Domain Is an Essential Craniofacial Organizer Acting through Kinin-Kallikrein Signaling.  
488 *Cell Rep* **8**:596–609. doi:10.1016/j.celrep.2014.06.026
- 489 Kong Y, Grimaldi M, Curtin E, Dougherty M, Kaufman C, White RM, Zon LI, Liao EC. 2014.  
490 Neural Crest Development and Craniofacial Morphogenesis Is Coordinated by Nitric  
491 Oxide and Histone Acetylation. *Chem Biol* **21**:488–501.  
492 doi:10.1016/j.chembiol.2014.02.013
- 493 Koop D, Chen J, Theodosiou M, Carvalho JE, Alvarez S, de Lera AR, Holland LZ, Schubert M.  
494 2014. Roles of retinoic acid and Tbx1/10 in pharyngeal segmentation: amphioxus and the  
495 ancestral chordate condition. *Evodevo* **5**:36. doi:10.1186/2041-9139-5-36
- 496 Koop D, Holland ND, Sémon M, Alvarez S, de Lera AR, Laudet V, Holland LZ, Schubert M.  
497 2010. Retinoic acid signaling targets Hox genes during the amphioxus gastrula stage:  
498 Insights into early anterior–posterior patterning of the chordate body plan. *Dev Biol*  
499 **338**:98–106. doi:10.1016/j.ydbio.2009.11.016
- 500 Langmead B, Salzberg SL. 2012. Fast gapped-read alignment with Bowtie 2. *Nat Methods*  
501 **9**:357–359. doi:10.1038/nmeth.1923

- 502 Lee C-M, Tripathi S, Morgan ET. 2017. Nitric oxide-regulated proteolysis of human CYP2B6  
503 via the ubiquitin-proteasome system. *Free Radic Biol Med* **108**:478–486.  
504 doi:10.1016/j.freeradbiomed.2017.04.015
- 505 Lee C, Lee B, Arnold SL, Isoherranen N, Morgan ET. 2014. Nitric Oxide and Interleukin-1  $\beta$   
506 Stimulate the Proteasome-Independent Degradation of the Retinoic Acid Hydroxylase  
507 CYP2C22 in Primary Rat Hepatocytes. *J Pharmacol Exp Ther* **348**:141–152.  
508 doi:10.1124/jpet.113.209841
- 509 Li G, Liu X, Xing C, Zhang H, Shimeld SM, Wang Y. 2017. Cerberus–Nodal–Lefty–Pitx  
510 signaling cascade controls left – right asymmetry in amphioxus. *Proc Natl Acad Sci*  
511 **114**:3684–3689. doi:10.1073/pnas.1620519114
- 512 Li H, Handsaker B, Wysoker A, Fennell T, Ruan J, Homer N, Marth G, Abecasis G, Durbin R.  
513 2009. The Sequence Alignment/Map format and SAMtools. *Bioinformatics* **25**:2078–2079.  
514 doi:10.1093/bioinformatics/btp352
- 515 Liu Y, Lu X, Xiang F-L, Lu M, Feng Q. 2013. Nitric Oxide Synthase-3 Promotes Embryonic  
516 Development of Atrioventricular Valves. *PLoS One* **8**:e77611.  
517 doi:10.1371/journal.pone.0077611
- 518 Love MI, Huber W, Anders S. 2014. Moderated estimation of fold change and dispersion for  
519 RNA-seq data with DESeq2. *Genome Biol* **15**:550. doi:10.1186/s13059-014-0550-8
- 520 Marlétaz F, Firbas PN, Maeso I, Tena JJ, Bogdanovic O, Perry M, Wyatt CDR, de la Calle-  
521 Mustienes E, Bertrand S, Burguera D, Acemel RD, van Heeringen SJ, Naranjo S, Herrera-  
522 Ubeda C, Skvortsova K, Jimenez-Gancedo S, Aldea D, Marquez Y, Buono L, Kozmikova  
523 I, Permanyer J, Louis A, Albuixech-Crespo B, Le Petillon Y, Leon A, Subirana L, Balwierz  
524 PJ, Duckett PE, Farahani E, Aury J-M, Mangenot S, Wincker P, Albalat R, Benito-  
525 Gutiérrez È, Cañestro C, Castro F, D’Aniello S, Ferrier DEK, Huang S, Laudet V, Marais  
526 GAB, Pontarotti P, Schubert M, Seitz H, Somorjai I, Takahashi T, Mirabeau O, Xu A, Yu J-  
527 K, Carninci P, Martinez-Morales JR, Crollius HR, Kozmik Z, Weirauch MT, Garcia-  
528 Fernández J, Lister R, Lenhard B, Holland PWH, Escriva H, Gómez-Skarmeta JL, Irimia  
529 M. 2018. Amphioxus functional genomics and the origins of vertebrate gene regulation.  
530 *Nature* **564**:64–70. doi:10.1038/s41586-018-0734-6
- 531 Minoux M, Rijli FM. 2010. Molecular mechanisms of cranial neural crest cell migration and  
532 patterning in craniofacial development. *Development* **137**:2605–2621.

- 533 doi:10.1242/dev.040048
- 534 Moon K-Y. 2019. Upregulation of Nitric Oxide Synthase Activity by All- trans Retinoic Acid and  
535 13- cis Retinoic Acid in Human Malignant Keratinocytes. *Biomed Sci Lett* **25**:196–200.  
536 doi:10.15616/BSL.2019.25.2.196
- 537 Nott A, Watson PM, Robinson JD, Crepaldi L, Riccio A. 2008. S-nitrosylation of histone  
538 deacetylase 2 induces chromatin remodelling in neurons. *Nature* **455**:411–415.  
539 doi:10.1038/nature07238
- 540 Oulion S, Bertrand S, Belgacem MR, Le Petillon Y, Escriva H. 2012. Sequencing and Analysis  
541 of the Mediterranean Amphioxus (*Branchiostoma lanceolatum*) Transcriptome. *PLoS One*  
542 **7**:e36554. doi:10.1371/journal.pone.0036554
- 543 Sandelin A, Wasserman WW. 2005. Prediction of Nuclear Hormone Receptor Response  
544 Elements. *Mol Endocrinol* **19**:595–606. doi:10.1210/me.2004-0101
- 545 Schubert M, Holland ND, Laudet V, Holland LZ. 2006. A retinoic acid-Hox hierarchy controls  
546 both anterior/posterior patterning and neuronal specification in the developing central  
547 nervous system of the cephalochordate amphioxus. *Dev Biol* **296**:190–202.  
548 doi:10.1016/j.ydbio.2006.04.457
- 549 Schubert M, Yu J-K, Holland ND, Escriva H, Laudet V, Holland LZ. 2005. Retinoic acid  
550 signaling acts via Hox1 to establish the posterior limit of the pharynx in the chordate  
551 amphioxus. *Development* **132**:61–73. doi:10.1242/dev.01554
- 552 Sha Y, Marshall HE. 2012. S-nitrosylation in the regulation of gene transcription. *Biochim*  
553 *Biophys Acta - Gen Subj* **1820**:701–711. doi:10.1016/j.bbagen.2011.05.008
- 554 Sirsjö A, Gidlöf AC, Olsson A, Törmä H, Ares M, Kleinert H, Förstermann U, Hansson GK.  
555 2000. Retinoic Acid Inhibits Nitric Oxide Synthase-2 Expression through the Retinoic Acid  
556 Receptor- $\alpha$ . *Biochem Biophys Res Commun* **270**:846–851. doi:10.1006/bbrc.2000.2535
- 557 Soukup V, Yong L, Lu T-M, Huang S-W, Kozmik Z, Yu J-K. 2015. The Nodal signaling  
558 pathway controls left-right asymmetric development in amphioxus. *Evodevo* **6**:5.  
559 doi:10.1186/2041-9139-6-5
- 560 Wang H, Holland PWH, Takahashi T. 2019. Gene profiling of head mesoderm in early  
561 zebrafish development: insights into the evolution of cranial mesoderm. *Evodevo* **10**:14.  
562 doi:10.1186/s13227-019-0128-3
- 563

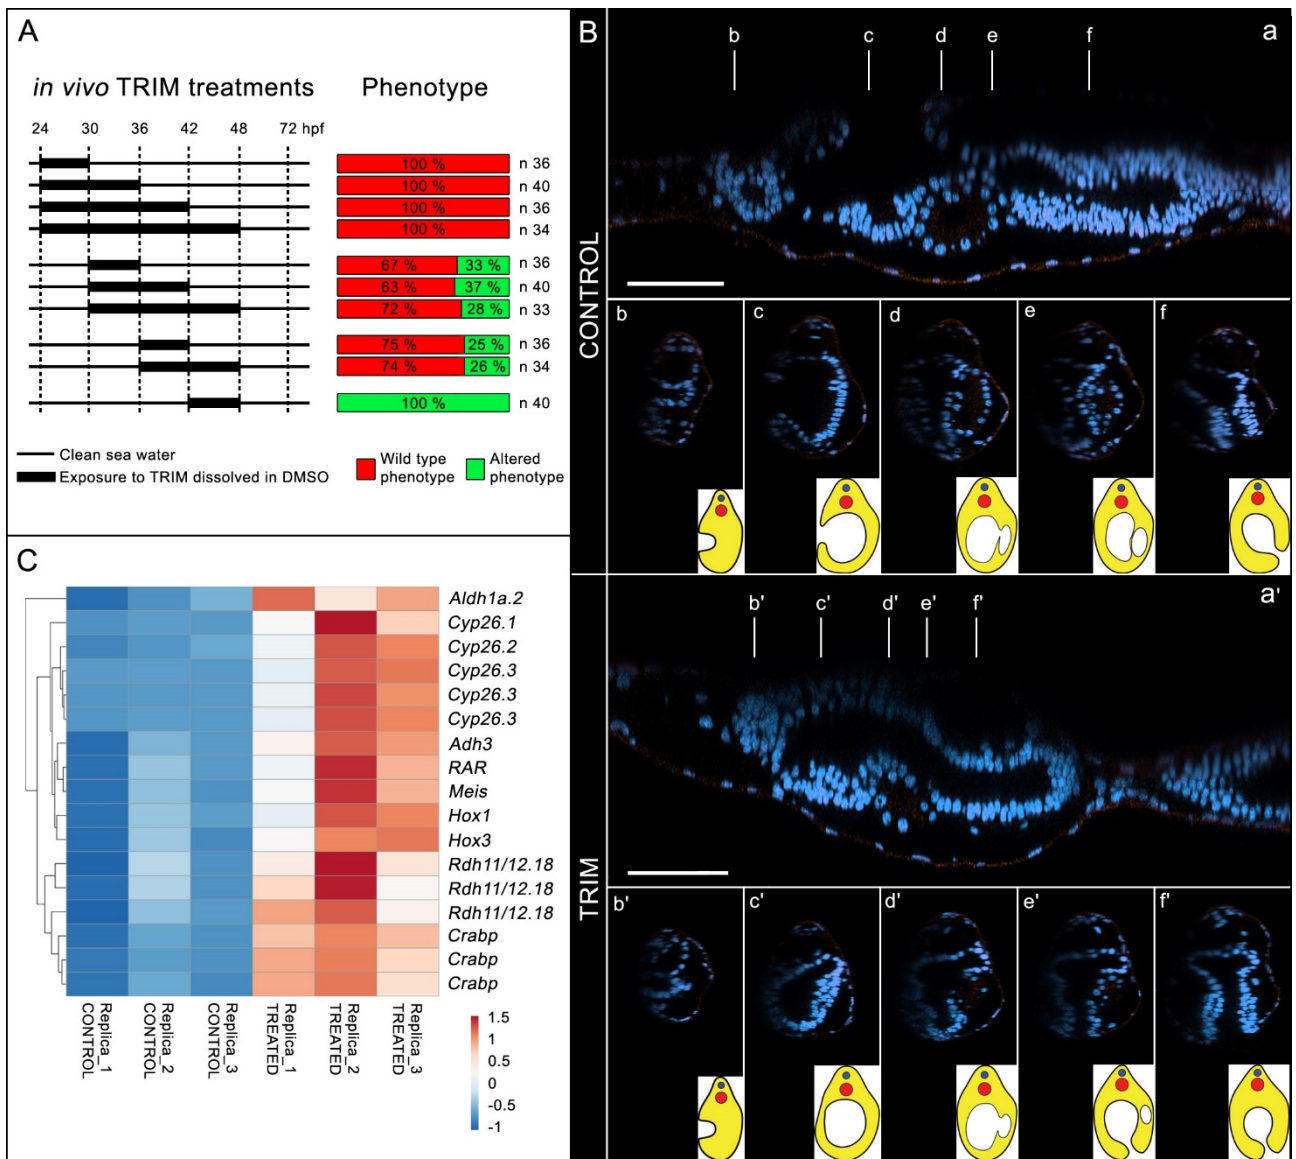

**Figure 1. Phenotypic characterization of *in vivo* TRIM treatment during early amphioxus embryogenesis.** A) Schematic representation of time intervals during which embryos were grown in presence of TRIM and the obtained resulting phenotype. B) Digital sections of control and TRIM-treated larvae after DAPI staining showing alteration in pharyngeal region. Anterior to the left. C) Gene expression heatmap of differential transcriptomic analysis (control versus TRIM).

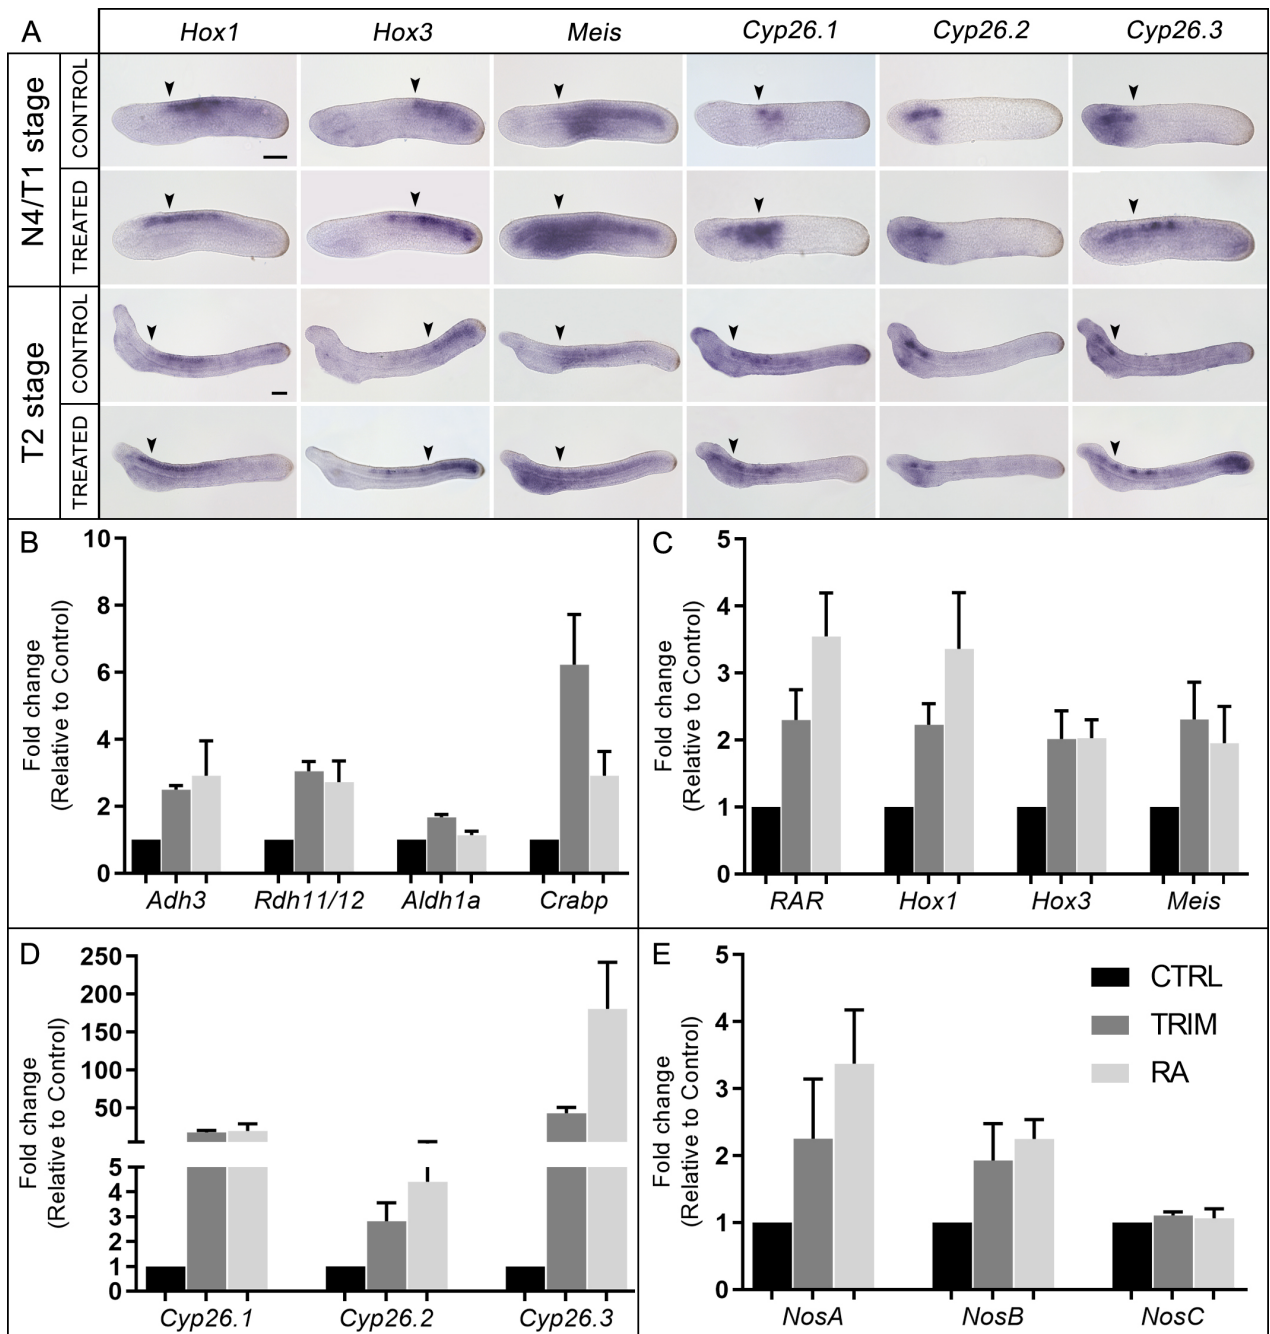

**Figure 2. Analysis of gene expression. A)** Gene expression pattern by *in situ* hybridization of *Hox1*, *Hox3*, *Meis*, *Cyp26.1*, *Cyp26.2* and *Cyp26.3* after the inhibition of NO production and in controls in 30 hpf (N4/T1 stage) and 42 hpf (T2) embryos. The anterior (*Hox1*, *Hox3*, *Meis*, *Cyp26.1*) and posterior (*Cyp26.3*) limits of gene expression territories in a wild type embryo are indicated with arrowheads in both control and TRIM-treated conditions showing the posteriorization (or anteriorization for *Cyp26.3*) of gene expression in treated embryos. Embryos orientation: anterior to the left, dorsal to the top. Scale bars: N4/T1 stage: 50µM; T2 stage: 50µM. **B-E)** Histograms of qRT-PCR experiment results show expression level changes, after 6 hours of pharmacological TRIM or RA treatments, of: **B)** genes encoding enzymes for RA synthesis: *Adh3*, *Rdh11/12.18*, *Aldh1a.2* and binding protein for storage: *Crabp*; **C)** genes known as direct targets of RA: *Hox1*, *Hox3*, *Meis*, *RAR*; **D)** genes encoding RA degradation enzymes: *Cyp26.1*, *Cyp26.2*, *Cyp26.3*; **E)** *Nos* genes: *NosA*, *NosB*, *NosC*. The gene expression analyses were performed by qRT-PCR on 30 hpf embryos (N4) RNA samples. The statistical analysis showed a pvalue <0,05 for all the data, except for *NosA* after TRIM in **(E)** that show a pvalue = 0,07.



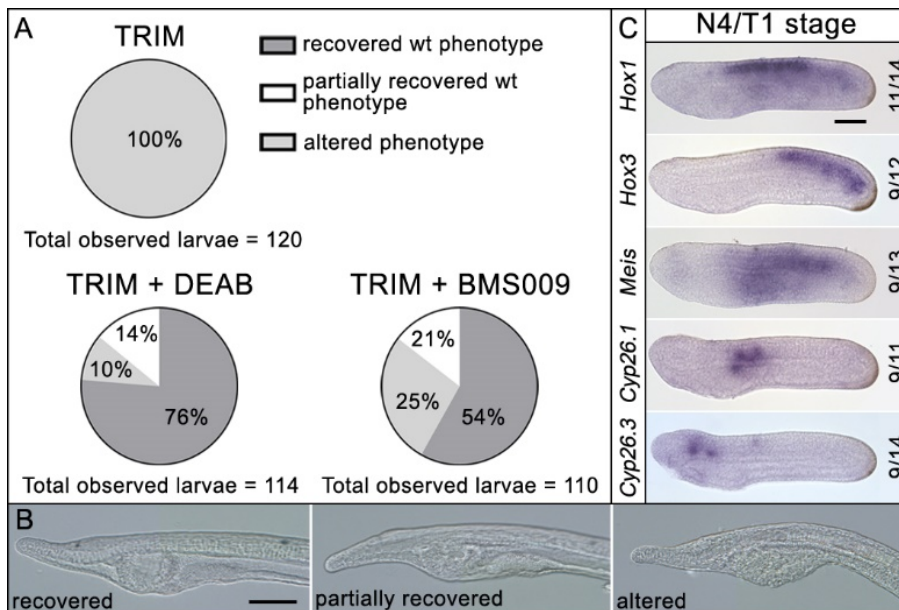

**Figure 3. Phenotypic rescue effect of DEAB and BMS009 on TRIM-treated embryos.** A) Pie charts of the phenotypes observed after TRIM treatment and the combinatorial pharmacological treatments TRIM (100  $\mu$ M) + DEAB (25  $\mu$ M) and TRIM (100  $\mu$ M) + BMS009 (10<sup>-6</sup> M). The percentages of each observed phenotype are reported in the respective portions of the graphs. For each treatment, the total number of observed larvae is indicated below the chart. B) Pictures of the pharyngeal region of larvae presenting the three different classes of phenotype observed in the rescue experiments: recovered wild type phenotype, partially recovered wild type phenotype, altered phenotype. C) Gene expression pattern analyses by *in situ* hybridization of *Hox1*, *Hox3*, *Meis*, *Cyp26.1*, and *Cyp26.3* after rescue assay with DEAB show the restoration of wild-type gene expression territories of the analyzed genes. *Cyp26.2* expression was not assayed because its localization in the embryo does not change after TRIM treatment. The numbers indicate the ratio between embryos showing a restored expression pattern and the total number of embryos analyzed. Embryos orientation: anterior to the left, dorsal to the top. Scale bar: 50  $\mu$ M.

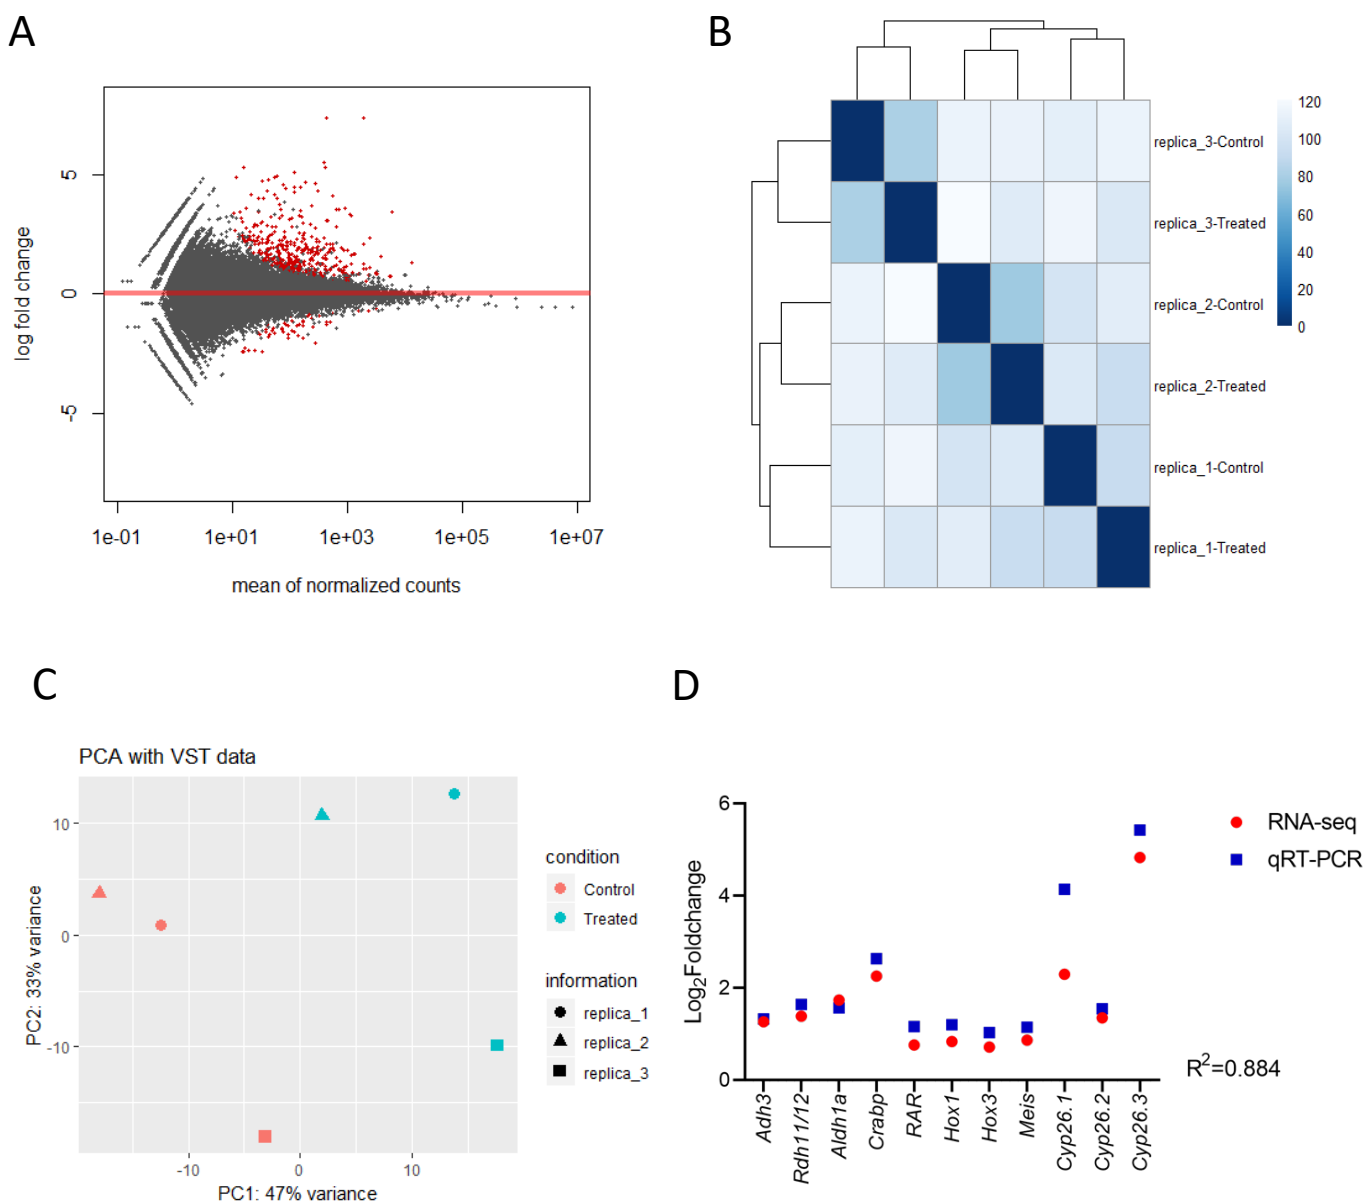

**Figure supplement 1. Quality of RNA-seq data.** A) MA plot, red dots plotted represent genes with an adjusted  $p$  value  $< 0,1$  (treated vs control). B) Heatmap of sample-to-sample distances, strains are clustered by replicas (3 controls and 3 treated); C. Principal component analysis (PCA) plot. Sample classes are highlighted in different colors: control in red and treated in blue. D) Gene expression correlation between RT-qPCR and RNA-seq data for the following selected genes: Adh3, Rdh11/12.18, Aldh1a.2, Crabp, RAR, Hox1, Hox3, Meis, Cyp26.1, Cyp26.2 and Cyp26.3.

Blue squares indicate Log<sub>2</sub> of relative foldchanges obtained from RT-qPCR analysis of TRIM-treated versus untreated samples. Red circles indicate Log<sub>2</sub> of relative foldchanges obtained from RNAseq analysis of TRIM-treated versus untreated samples. The Pearson correlation Coefficient ( $R^2$ ) is indicated.

A

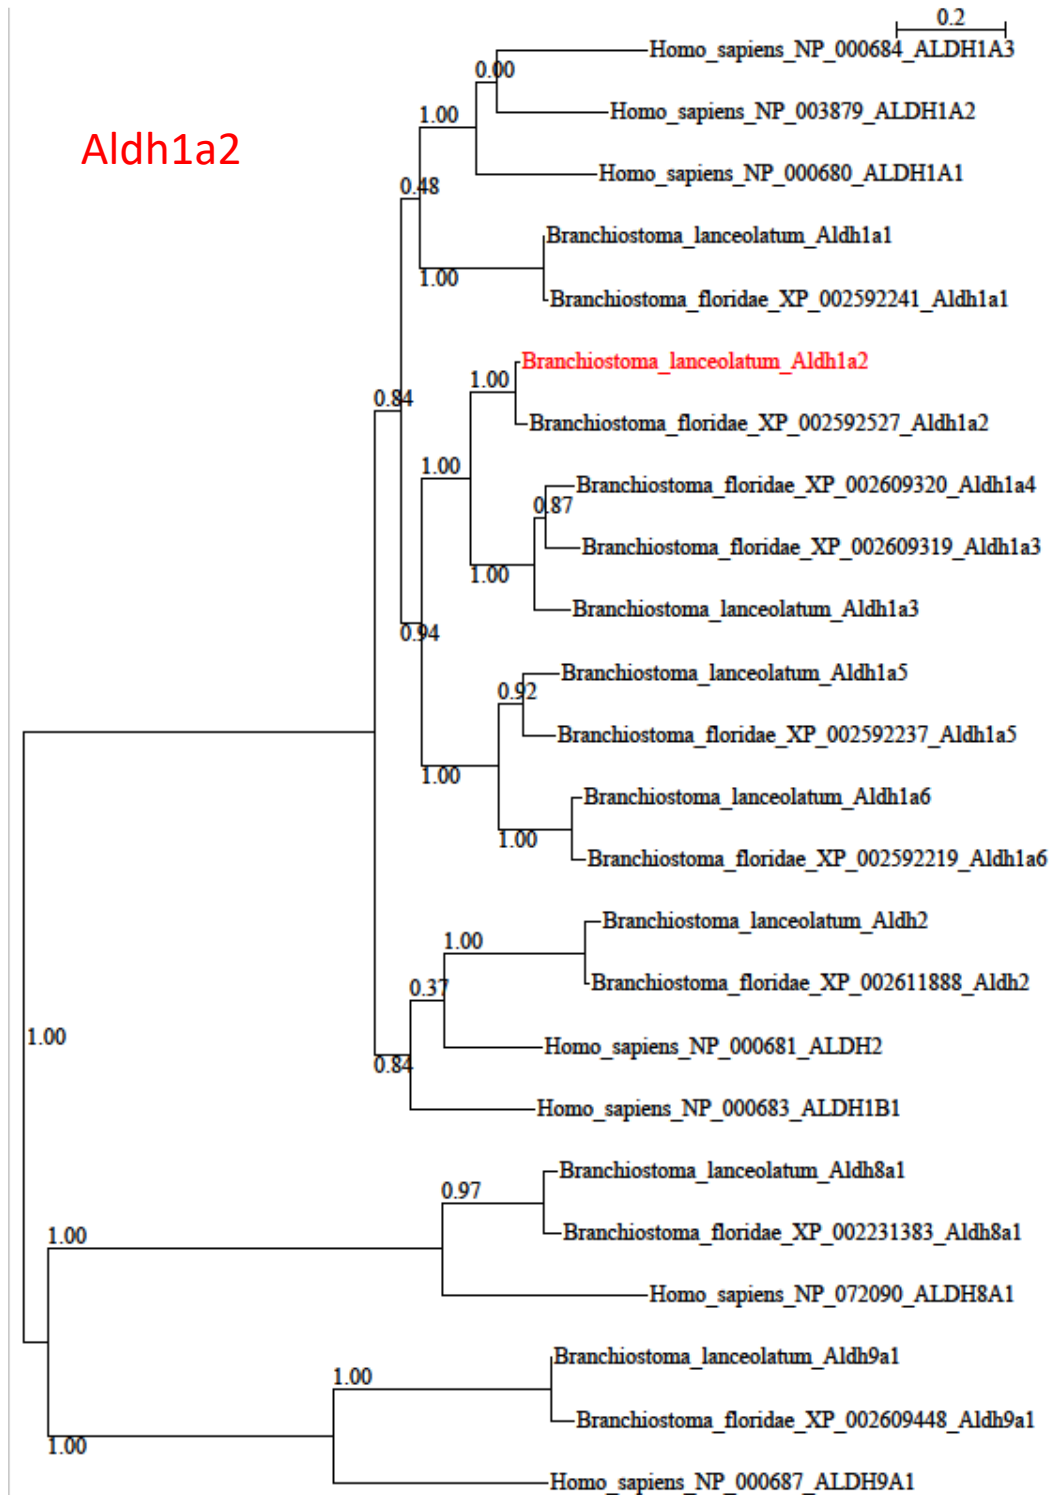

**Figure supplement 2. Phylogenetic analysis of RA pathway genes resulted upregulated in the differential WT versus TRIM transcriptome.** The analysis allowed the identification of *Branchiostoma lanceolatum* homologs (indicated in red in the trees) for (A) Aldh1a2 (ContigAmph4820) and (B) Rdh11/12.18 (ContigAmph8913/ContigAmph35515/ContigAmph81467). Trees were calculated using Maximum Likelihood (ML) method, and bootstrap supports are given at each node. The GenBank accession number is indicated for each protein sequence used.



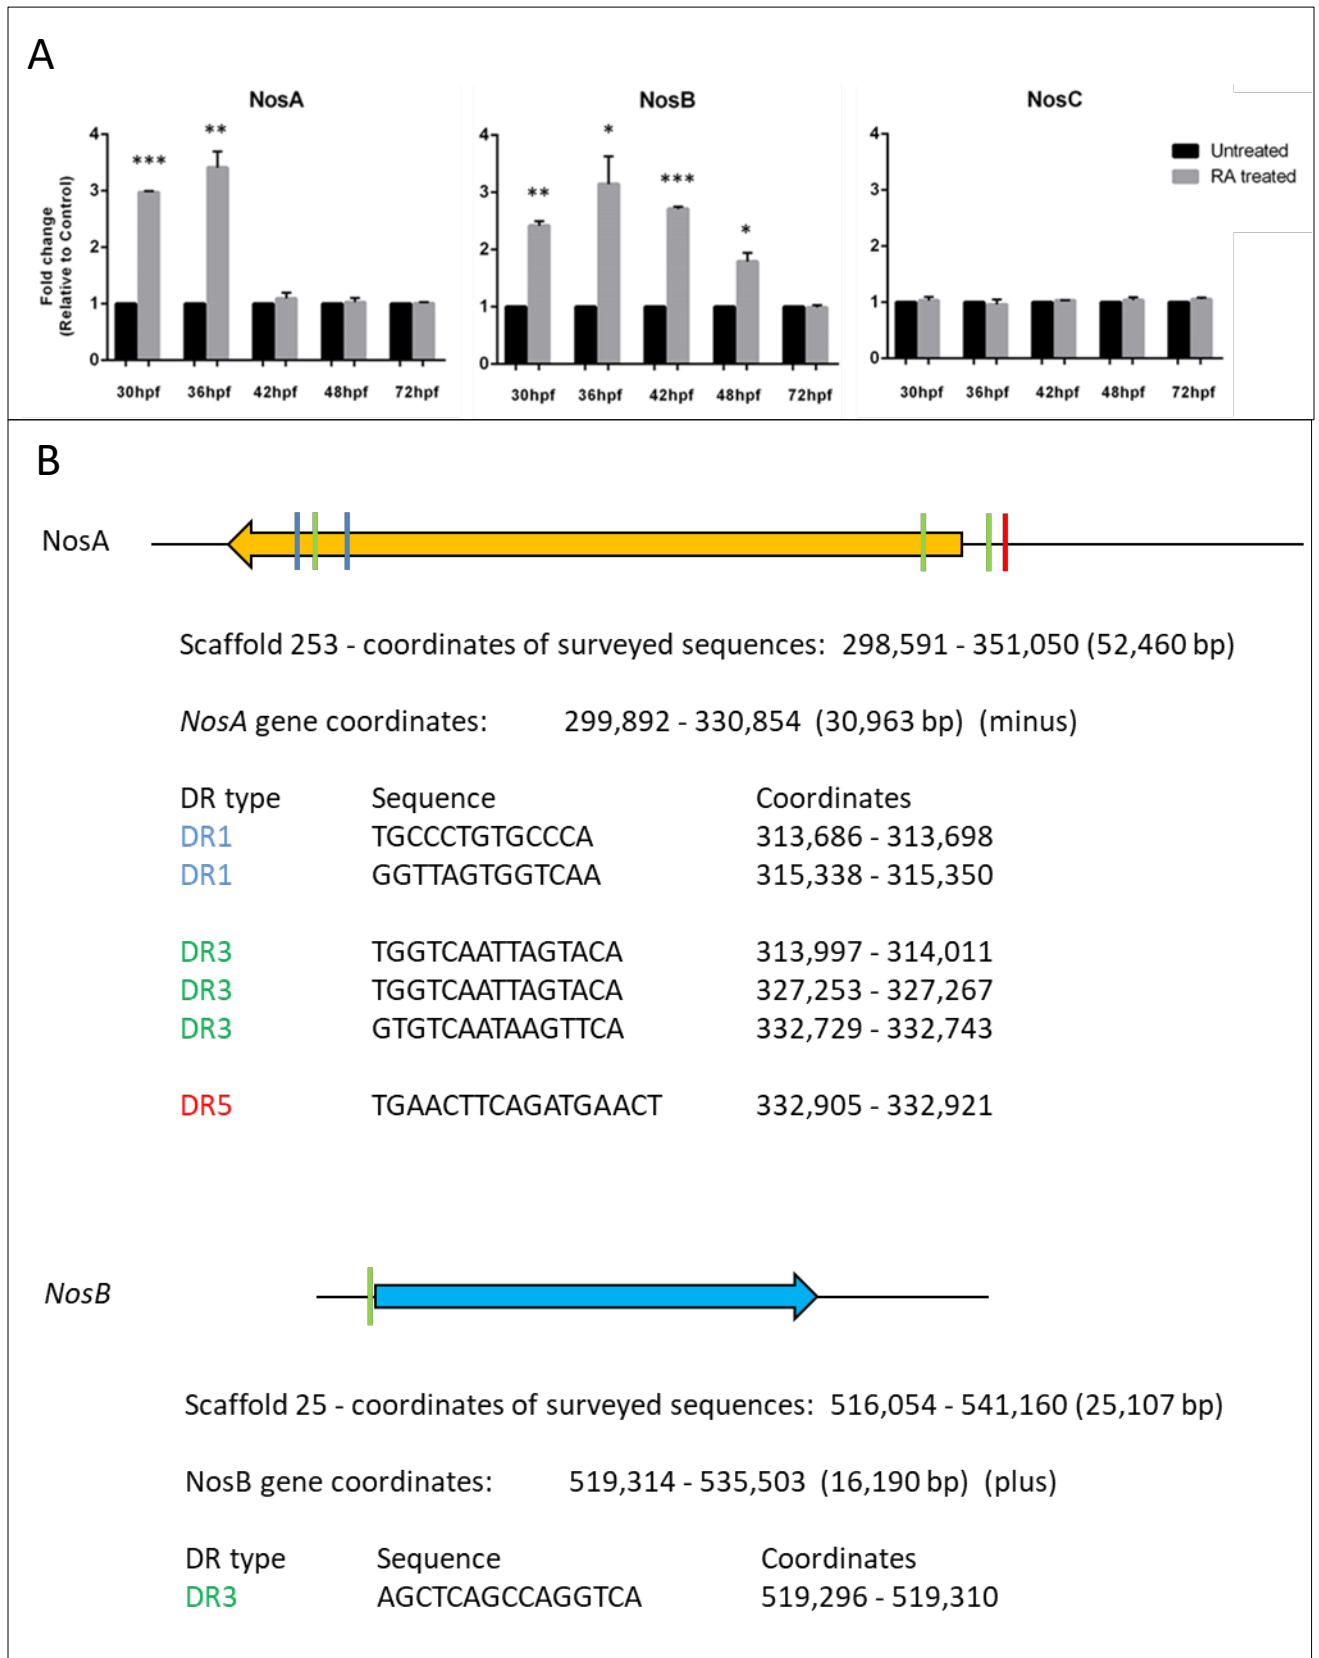

**Figure supplement 3. A)** *Nos* genes expression pattern by RT-qPCR after RA treatment during amphioxus development. Five developmental time points were assayed from 30 to 72 hours post-fertilization. \* = pvalue<0,05; \*\*= pvalue<0,005; \*\*\*= pvalue<0,001. **B)** *In silico* prediction analysis of RARE elements in genomic loci of *Branchiostoma lanceolatum* *NosA* and *NosB*. The analysis was limited to neighboring genes on both sides of each *Nos* gene. Direct Repeat 1 (DR1) are shown in blue, DR3 in green and DR5 in red. Sequence and coordinates of each putative DR are indicated.

| Probes for <i>in situ</i> hybridization |                                                                 |                     |
|-----------------------------------------|-----------------------------------------------------------------|---------------------|
| Genes                                   | Forward and reverse primer                                      | Product length (bp) |
| <i>Hox1</i>                             | 5'- GAGCAAATGGACACGGCAAG -3'<br>5'- CTTGACGGGCTATCTTAC -3'      | 855 bp              |
| <i>Hox3</i>                             | 5'- GAGGTGGTGGCAGCTATGG -3'<br>5'- CGCAGTAGTTCATATTGACCAC -3'   | 1077 bp             |
| <i>Meis</i>                             | 5'- CAGTCGCCACGTCTATGTACG -3'<br>5'- CTGGACTATCCTGCGCCTC -3'    | 983 bp              |
| <i>Cyp26.1</i>                          | 5'- GCTGGTACTGGTGTGTGGAG -3'<br>5'- ACATCACGCGCCGCTAACAC -3'    | 759 bp              |
| <i>Cyp26.2</i>                          | 5'- CTGCTGCTGTCCTGGAAGCTG -3'<br>5'- GTCTCCACTGTCTCCTCCCTG -3'  | 720 bp              |
| <i>Cyp26.3</i>                          | 5'- CAGACTTCTCCCCTAAGCGAC -3'<br>5'- CCCAACAGGTGGACTTAGC -3'    | 891 bp              |
| Real time RT-PCR primers                |                                                                 |                     |
| Genes                                   | Forward and reverse primer                                      | Product length (bp) |
| <i>Adh3</i>                             | 5'- GTCCACAGTGCAAGGAGTG -3'<br>5'- CCACCGTACTCGCTGAAG -3'       | 175 bp              |
| <i>Rdh11/12_18</i>                      | 5'- CAGCAGGAGGGAAGTGTGAG -3'<br>5'- GGACGCAAGGTCAAGTTTCTG -3'   | 227 bp              |
| <i>Aldh1a_2</i>                         | 5'- GTAAGATCATCCAGGCAGCAG -3'<br>5'- CGTCGTAGACAGATTCTCCAC -3'  | 201 bp              |
| <i>Crabp</i>                            | 5'- GTCAGCTTCAAGATCGGAGAG -3'<br>5'- CTTTCATCACCAGGTACATCCG -3' | 171 bp              |
| <i>RAR</i>                              | 5'- GTCGTCTGGCTACCACTACGG -3'<br>5'- ACCTGCAGAACTGGCATCTG -3'   | 152 bp              |
| <i>Hox1</i>                             | 5'- GGATACATGCACCACCATAACG -3'<br>5'- GTCCGTCCGTTGTTGGGTCCG -3' | 176 bp              |
| <i>Hox3</i>                             | 5'- CCGACAACAACCACAGCAG -3'<br>5'- CACAGGTAGCGGTTGAAGTGG -3'    | 256 bp              |
| <i>Meis</i>                             | 5'- CAGTCGCCACGTCTATGTACG -3'<br>5'- GAAAGAGTGGATGCCCGTAG -3'   | 198 bp              |
| <i>Cyp26.1</i>                          | 5'- GCTGGTACTGGTGTGTGGAG -3'<br>5'- CGTGGAGAATCTTGCGCAC -3'     | 248 bp              |
| <i>Cyp26.2</i>                          | 5'- CAGGGAGGAGACAGTGGAGAC -3'<br>5'- CTTCTCCAGGTCTCATGCAC -3'   | 210 bp              |
| <i>Cyp26.3</i>                          | 5'- CAGGAAGTTGCGGCATATCTTG -3'<br>5'- GTCGCTTACGGGAGAAGTCTG -3' | 190 bp              |
| <i>NosA</i>                             | 5'- AGTACAGTCATCTCCAGAAC -3'<br>5'- TCTTGAAGCGCTTCTATCTG -3'    | 221 bp              |
| <i>NosB</i>                             | 5'- AGTTTACTCCCGGCGATCA -3'<br>5'- AGAACATGGCGGCAAACGC -3'      | 191 bp              |
| <i>NosC</i>                             | 5'- CAGGATTCTGCGCGTTTGC -3'<br>5'- GGAGCTAGCCTCGCTCATG -3'      | 197 bp              |
| <i>Rpl32</i>                            | 5'- GGCTTCAAGAAATTCCTCGTC -3'<br>5'- GATGAGTTTCTCTTGCGCGA -3'   | 117 bp              |

**Supplementary table 1.** Oligonucleotides used to amplify probes for *in situ* hybridization experiments and for Real time RT-PCR analyses.
